# Supplementary material for: Cervicovaginal fluid cytokines as predictive markers of preterm birth in symptomatic women
Source: PubMed Central journal article supplement — Obstet Gynecol Sci. 2020 Jun 19;63(4):455–63. doi: 10.5468/ogs.19131 (PMC7393743; doi:10.5468/ogs.19131), 2020-06-19
Supplement: ogs-19131-s001.pdf [file ogs-19131-s001.pdf]

**Supplementary Table 1.** Cervicovaginal fluid cytokine levels in preterm labor patients in the study group and control group

| Cytokine    | Delivery at <34 wk (n=12) | Delivery at ≥34 wk (n=28) | P-value <sup>b)</sup> |
|-------------|---------------------------|---------------------------|-----------------------|
| MIP-1β      | 5.77 (0–178)              | 2.40 (0–301)              | 0.320                 |
| MIP-1α      | 6.57 (0–82)               | 5.60 (0–105)              | 0.184                 |
| TNF-α       | 0 (0–9)                   | 0 (0–7.3)                 | 0.263                 |
| IL-1β       | 293.58 (0–3,321)          | 137.88 (0–2,693)          | 0.328                 |
| IL-6        | 32.07 (0–1,289)           | 0 (0–757)                 | 0.023 <sup>a)</sup>   |
| IL-8        | 3,663.22 (263–10,069)     | 3,931.00 (489–10,365)     | 0.326                 |
| IL-17α      | 6.54 (1–15)               | 4.65 (1–12)               | 0.122                 |
| G-CSF       | 81.29 (0–1,097)           | 10.38 (0–818)             | 0.062                 |
| IL-7        | 2.81 (0–19)               | 0 (0–20)                  | 0.040 <sup>a)</sup>   |
| fFN (ng/mL) | 58 (19–699)               | 24 (11–142)               | 0.049 <sup>a)</sup>   |

Data are expressed as the median (range) (pg/mL).

MIP, macrophage inflammatory protein; TNF, tumor necrosis factor; IL, interleukin; G-CSF, granulocyte colony stimulating factor; fFN, fetal fibronectin.

<sup>a)</sup>Significant difference between two groups ( $P < 0.05$ ); <sup>b)</sup>Using Mann-Whitney  $U$  test.
