# Supplementary material for: Cervicovaginal fluid cytokines as predictive markers of preterm birth in symptomatic women
Source: PubMed Central journal article supplement — Obstet Gynecol Sci. 2020 Jun 19;63(4):455–63. doi: 10.5468/ogs.19131 (PMC7393743; doi:10.5468/ogs.19131), 2020-06-19
Supplement: ogs-19131-s002.pdf [file ogs-19131-s002.pdf]

# Obstetrics & Gynecology Science

Sunwha Park, et al. CVF cytokine for prediction of PTB

**Supplementary Table 2.** Receiver operating characteristic curve analysis in preterm labor patients

| Cytokine | AUC   | 95% CI      | P-value | Cut-off | Sensitivity | Specificity |
|----------|-------|-------------|---------|---------|-------------|-------------|
| IL-6     | 0.794 | 0.610–0.978 | 0.036   | 31.25   | 83          | 76          |
| IL-7     | 0.779 | 0.543–1.000 | 0.046   | 0.98    | 83          | 64          |
| fFN      | 0.672 | 0.425–0.918 | 0.220   | 49.50   | 33          | 70          |

AUC, area under a receiver operating characteristic curve; CI, confidence interval; IL, interleukin; fFN, fetal fibronectin.
