# Supplementary material for: Cervicovaginal fluid cytokines as predictive markers of preterm birth in symptomatic women
Source: PubMed Central journal article supplement — Obstet Gynecol Sci. 2020 Jun 19;63(4):455–63. doi: 10.5468/ogs.19131 (PMC7393743; doi:10.5468/ogs.19131), 2020-06-19
Supplement: ogs-19131-s003.pdf [file ogs-19131-s003.pdf]

**Supplementary Table 3.** Cervicovaginal fluid cytokine levels in preterm premature rupture of membranes patients in the study group and control group

| Cytokine | Delivery at <34 wk (n=11) | Delivery at ≥34 wk (n=8) | P-value <sup>b)</sup> |
|----------|---------------------------|--------------------------|-----------------------|
| MIP-1β   | 25.70 (0–165)             | 20.54 (0–48)             | 0.375                 |
| MIP-1α   | 18.04 (3–308)             | 4.78 (0–20)              | 0.203                 |
| TNF-α    | 0 (0–22)                  | 2 (0–9)                  | 0.236                 |
| IL-1β    | 6.18 (0–218)              | 0 (0–1)                  | 0.043 <sup>a)</sup>   |
| IL-6     | 95 (3–937)                | 35 (0–189)               | 0.203                 |
| IL-8     | 1,914 (235–7,172)         | 393 (154–1,284)          | 0.101                 |
| IL-17α   | 5.92 (2–11)               | 2.36 (0–5)               | 0.055                 |
| G-CSF    | 34.94 (0–180)             | 165 (17–462)             | 0.146                 |
| IL-7     | 0 (0–13)                  | 0 (0–12)                 | 0.696                 |

Data are expressed as the median (range) (pg/mL).

MIP, macrophage inflammatory protein; TNF, tumor necrosis factor; IL, interleukin; G-CSF, granulocyte colony stimulating factor.

<sup>a)</sup>Significant difference between 2 groups ( $P < 0.05$ ); <sup>b)</sup>Using Mann-Whitney  $U$  test.
